# Supplementary material
Source: Research Square preprint supplement (doi:10.21203/rs.3.rs-9978414/v1)

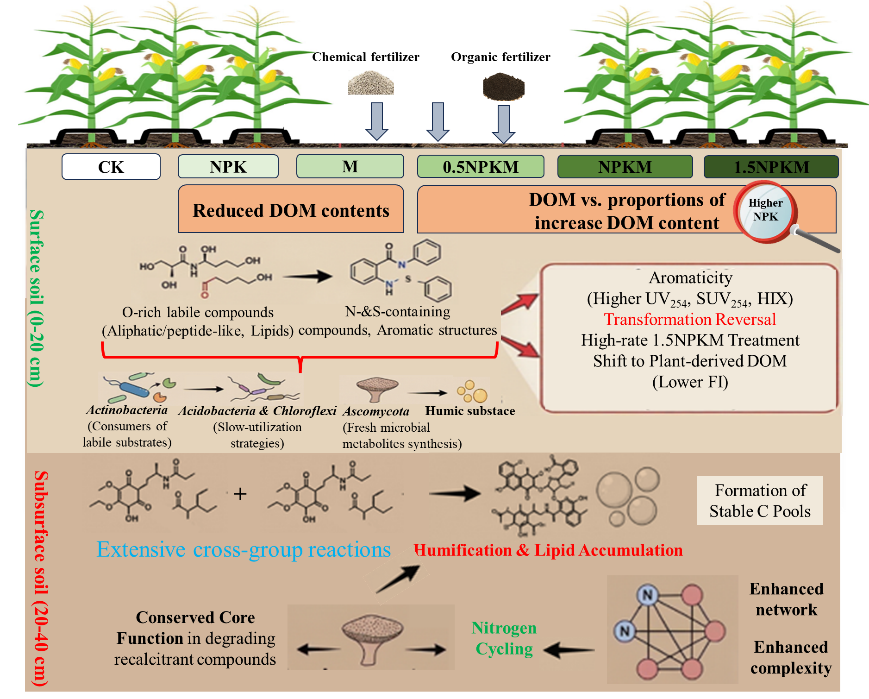

Supplement: Supplementary file 1 [file c2698dcb6e5b4d73e5942fb9.docx]
